# Supplementary material
Source: PubMed Central journal article supplement (PMC5444525)
Supplement: NIHMS72083-supplement-Supplementary_Figures.pdf [file NIHMS72083-supplement-Supplementary_Figures.pdf]

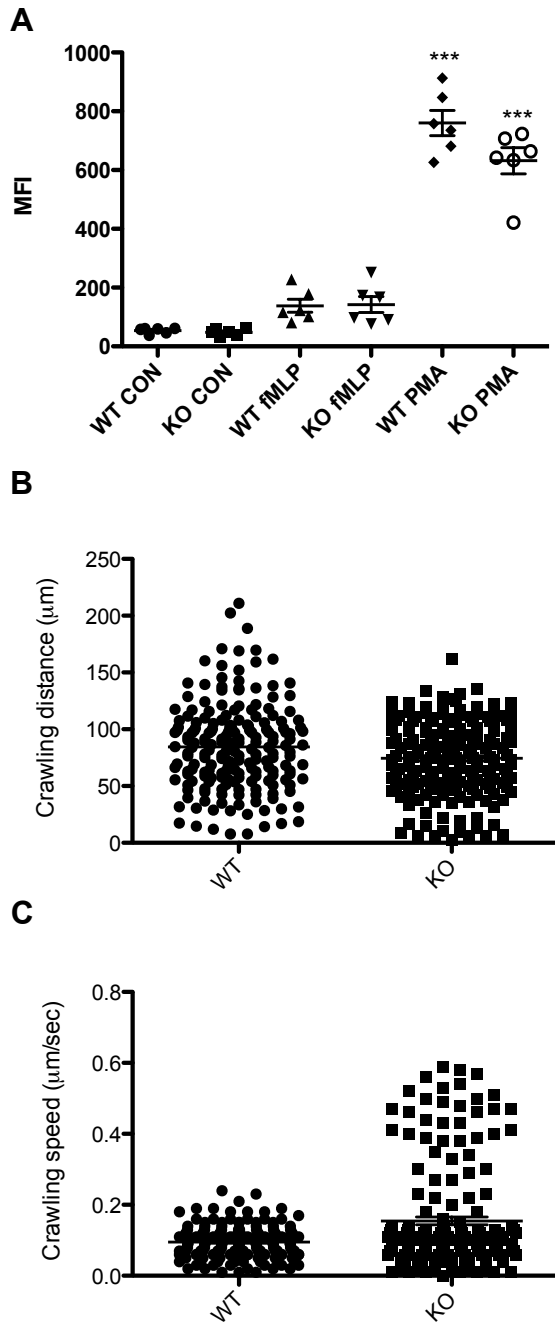

**Supplementary Figure 1. Activation of CD11b and crawling on ICAM-1 is not impaired in Gal-3<sup>-/-</sup> neutrophils.** Bone marrow neutrophils were isolated from Gal-3<sup>-/-</sup> and C57BL/6 mice. Binding of alexa488-conjugated fibrinogen to Ly6G positive neutrophils was assessed by flow cytometry following stimulation with fMLP (1μM) and PMA (50ng/ml) (A); n=6 mice per group. Neutrophil crawling was assessed following activation of cells with murine recombinant TNF-α (10ng/ml). Neutrophils were allowed to adhere to murine recombinant ICAM-1 coated IBIDI chambers for 5 mins and then crawling was assessed under flow (2dyne/cm<sup>2</sup>) over 15mins. Images were acquired every 10 sec. Distance travelled (B) and velocity (C) was quantified for 50 cells per mouse using ImageJ; n= 4 mice per group. \*\*\* P<0.01 vs respective control.

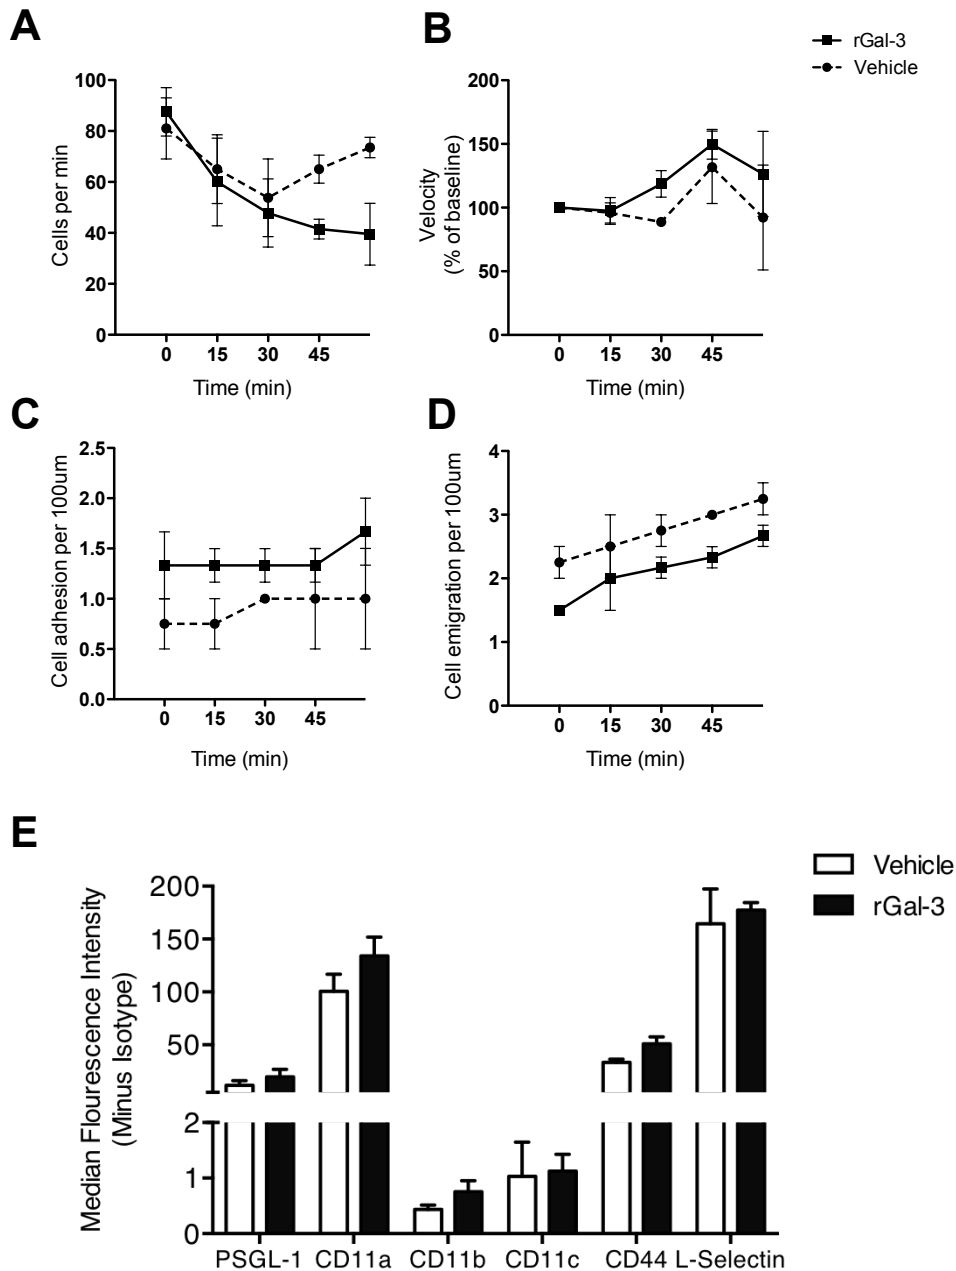

**Supplementary Figure 2. Intravenous administration of recombinant Gal-3 does not affect leukocyte recruitment or cell adhesion molecule expression.**

Cremasteric post-capillary venules of C57BL/6 mice were analysed by intravital microscopy following intravenous administration of vehicle saline (200µL) or rGal-3 (150ng) 30 min post exteriorisation. Levels of leukocyte cell flux (A), rolling velocity (B), leukocyte adhesion (C) and emigration (D) were assessed. All data obtained from segments of 100µm in 3-5 vessels per mouse and 2-3 mice per group. Results are expressed as mean±SEM for all parameters analysed. Statistical significance was assessed by two-way ANOVA and with Bonferroni's multiple comparison post-test. (E) Wild type C57BL/6 mice were treated intravenously for 4h with vehicle (200µL saline) or rGal-3 (150ng) prior to leukocyte assessment of PSGL-1, CD11a, CD11b, CD11c, CD44 or CD62L (L-selectin) expression by flow cytometry. Results are mean±SEM of 3 mice per group and significance was assessed using an unpaired student's t-test.
